# Supplementary material for: Modeling and Measuring Tree-Reading Skills in Undergraduate and Graduate Students
Source: Atypon-hosted journal article supplement (doi:10.1187/cbe.20-06-0131), 2021-06-08

# Supplemental Material

*CBE—Life Sciences Education*

Schramm *et al.*

| <b>Item</b> | <b>Skill level</b> | <b>Item Discrimination</b> | <b>Item Difficulty</b> | <b>Item Outfit</b> | <b>Item Infit</b> |
|-------------|--------------------|----------------------------|------------------------|--------------------|-------------------|
| <b>A1</b>   | 1                  | .332                       | 0.083                  | 0.990              | 0.988             |
| <b>A2</b>   | 1                  | .142                       | -0.583                 | 1.158              | 1.094             |
| <b>A3</b>   | 2                  | .318                       | -1.325                 | 0.833              | 0.912             |
| <b>A4</b>   | 2                  | .274                       | -0.363                 | 1.041              | 1.013             |
| <b>A5</b>   | 3                  | .342                       | -0.321                 | 0.964              | 0.980             |
| <b>A6</b>   | 3                  | .164                       | 0.477                  | 1.131              | 1.093             |
| <b>A7</b>   | 1                  | .263                       | -0.337                 | 1.021              | 1.028             |
| <b>A9</b>   | 4                  | .319                       | 0.796                  | 1.027              | 0.989             |
| <b>A10</b>  | 2                  | .225                       | -0.166                 | 1.075              | 1.056             |
| <b>A11</b>  | 2                  | .455                       | -1.555                 | 0.749              | 0.874             |
| <b>A12</b>  | 3                  | .371                       | -0.543                 | 0.926              | 0.965             |
| <b>A13</b>  | 3                  | .378                       | -0.402                 | 0.941              | 0.960             |
| <b>A14</b>  | 4                  | .278                       | 1.287                  | 1.052              | 0.989             |
| <b>B1</b>   | 1                  | .236                       | 1.222                  | 1.053              | 1.027             |
| <b>B2</b>   | 1                  | .299                       | 0.262                  | 1.003              | 0.998             |
| <b>B3</b>   | 2                  | .408                       | -0.999                 | 0.864              | 0.919             |
| <b>B4</b>   | 2                  | .148                       | 0.168                  | 1.153              | 1.112             |
| <b>B5</b>   | 3                  | .297                       | -0.532                 | 0.999              | 1.016             |
| <b>B6</b>   | 4                  | .257                       | 1.217                  | 1.038              | 1.017             |
| <b>B7</b>   | 3                  | .234                       | 1.487                  | 1.078              | 1.009             |
| <b>B8</b>   | 1                  | .355                       | 1.577                  | 0.914              | 0.951             |
| <b>B9</b>   | 1                  | .095                       | -0.174                 | 1.193              | 1.159             |
| <b>B10</b>  | 2                  | .392                       | -0.765                 | 0.907              | 0.928             |
| <b>B11</b>  | 2                  | .432                       | -1.382                 | 0.824              | 0.897             |
| <b>B12</b>  | 3                  | .408                       | -0.726                 | 0.885              | 0.932             |
| <b>B14</b>  | 4                  | .253                       | 0.817                  | 1.062              | 1.013             |
| <b>M</b>    |                    | .295                       | -0.030                 | 0.995              | 0.997             |
| <b>SD</b>   |                    | .094                       | 0.908                  | 0.111              | 0.068             |
| <b>Min</b>  |                    | .095                       | -1.555                 | 0.749              | 0.874             |
| <b>Max</b>  |                    | .432                       | 1.577                  | 1.193              | 1.159             |

Color coding: red = unscientific argumentation and wrong answer chosen  
orange = correct argumentation and wrong answer chosen  
yellow = unscientific argumentation and correct answer chosen  
green = correct argumentation and correct answer chosen

| Interview A-H | Identifying structures (A1 / B2)                               | Handling apomorphies (A10 / B3)                                                                       | Determining monophyletic groups (A12 / B12)                                  | Identifying relationships (A6 / B7)                                          | Comparing trees (A9 / B6)                                                      |
|---------------|----------------------------------------------------------------|-------------------------------------------------------------------------------------------------------|------------------------------------------------------------------------------|------------------------------------------------------------------------------|--------------------------------------------------------------------------------|
| A             | Internal nodes represent mutations mutation                    | Track apomorphies from terminal nodes backwards                                                       | Identify monophyletic groups by arguing with MRCA and naming all descendants | Number of internal nodes between groups is counted to determine relationship | Rationale is based on MRCA, rotation of nodes is stated as having no influence |
| B             | Different internal nodes are attributed with different meaning | Apomorphy on the last bifurcation event (eusociality in termites) is attributed to both sister groups | No rationale given                                                           | Order of terminal nodes represents relationship                              | Rationale only based on comparison of apomorphies                              |
| C             | Internal nodes are identified as MRCA                          | Track apomorphies from terminal nodes backwards                                                       | Identify monophyletic groups by arguing with MRCA and naming all descendants | MRCA is basis for response                                                   | Rationale is based on MRCA, rotation of nodes is stated as having no influence |
| D             | Internal nodes are identified as MRCA                          | Track apomorphies from root to terminal nodes                                                         | Identify monophyletic groups by arguing with MRCA and naming all descendants | Number of internal nodes between groups is counted to determine relationship | Rationale only based on comparison of apomorphies                              |
| E             | Internal nodes are identified as MRCA                          | Track apomorphies from terminal nodes backwards                                                       | Proximity of terminal nodes is used as basis for argumentation               | MRCA is basis for response                                                   | Rationale is based on MRCA, rotation of nodes is stated as having no influence |

|   |                                                                |                                                 |                                                                              |                                                                              |                                                                                                                                                                       |
|---|----------------------------------------------------------------|-------------------------------------------------|------------------------------------------------------------------------------|------------------------------------------------------------------------------|-----------------------------------------------------------------------------------------------------------------------------------------------------------------------|
| F | Internal nodes are identified as MRCA                          | Track apomorphies from root to terminal nodes   | Identify monophyletic groups by arguing with MRCA and naming all descendants | Number of internal nodes between groups is counted to determine relationship | Rationale based on apomorphies and various learners' conceptions                                                                                                      |
| G | Internal nodes are identified as MRCA                          | Track apomorphies from terminal nodes backwards | Identify monophyletic groups by arguing with MRCA and naming all descendants | MRCA is basis for response                                                   | Correct rationale using nested hierarchy, stating that order of terminal nodes does not bear any meaning. Different learners' conceptions are called upon but refused |
| H | Answer is given 'at first glance'. MRCA is explicitly excluded | Track apomorphies from root to terminal nodes   | Identify monophyletic groups by arguing with MRCA and naming all descendants | Number of internal nodes between groups is counted to determine relationship | Rationale is based on comparison of sister taxa                                                                                                                       |

# **Modeling and Measuring Tree-Reading Skills in (Under-) Graduate Students**

Schramm, Jose & Schmiemann 2021

## **Supplement Material 2**

### **Synthetic Tree-Reading model testing instrument.**

Correct answers are printed in bold.

### Material A 'Fish'

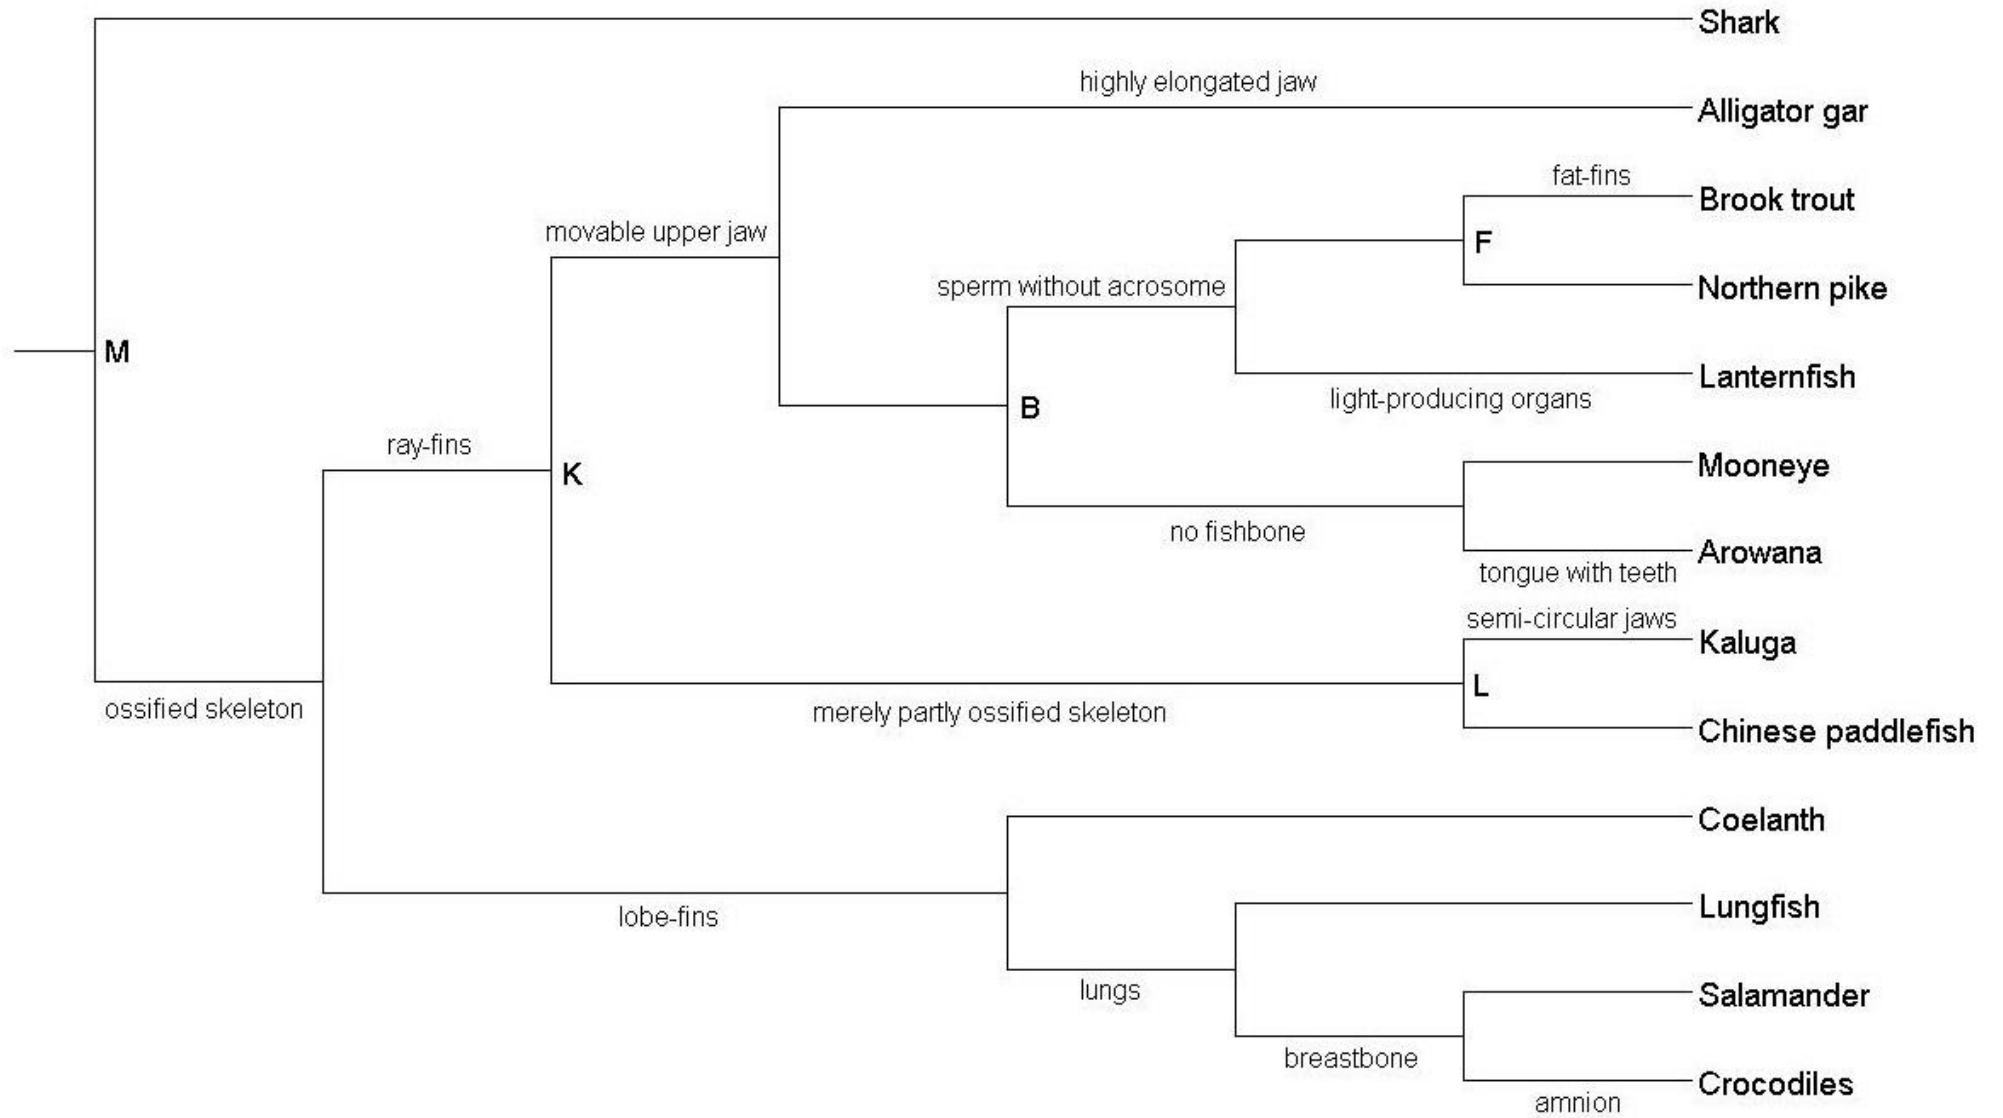

## Fish

Please answer the following questions concerning the evolutionary tree of fish (Material A).

### A1: What does the node L represent? (see Material A: Fish).

- The node represents the conjunction of the development lines of Kaluga and Chinese paddlefish.
- The node represents a change in the environment of Kaluga and Chinese paddlefish.
- The node represents the most recent common ancestor of Kaluga and Chinese paddlefish.**
- The node represents the extinction of a species and the survival of Kaluga and Chinese paddlefish.
- The node represents the occurrence of a mutation, leading to a split into Kaluga and Chinese paddlefish.

### A2: Tick the correct interpretation of the given evolutionary (see Material A: Fish).

- Brook trout and Northern pike are equally developed sister species.**
- Brook trout is further developed than Northern pike and Lanternfish.
- Lanternfish is an older species than Northern pike and Brook trout.
- Northern pike is an intermediate form between Brook trout and Lanternfish.
- Brook trout and Northern pike developed from Lanternfish

### A3: Assuming that all evolutionary changes are marked in the tree, which of the following traits does a Lung fish show (see Material A: Fish)?

- |                          |               |                      |                  |                           |
|--------------------------|---------------|----------------------|------------------|---------------------------|
| <input type="checkbox"/> | Lungs         | breastbone           | no amnion        | lobe-fins                 |
| <input type="checkbox"/> | No breastbone | no amnion            | lobe-fins        | not ossified skeleton     |
| <input type="checkbox"/> | No breastbone | amnion               | lobe-fins        | no light-producing organs |
| <input type="checkbox"/> | Lungs         | ray-fins             | no fat-fins      | ossified skeleton         |
| <input type="checkbox"/> | <b>Lungs</b>  | <b>no breastbone</b> | <b>no amnion</b> | <b>ossified skeleton</b>  |

### A4: Tick the group showing the following traits: Ray-fins, movable upper jaw, no light-producing organs, tongue without teeth (see Material A: Fish).

- Northern pike and Mooneye
- Brook trout, Northern pike, and Mooneye
- Chinese paddlefish, Northern pike, and Mooneye
- Brook trout, Northern pike, Alligator gar, and Arowana
- Brook trout, Northern trout, Alligator gar, and Mooneye**

**A5: Which of the following groups forms a clade / monophyletic group with Brook trout and Mooneye (see Material A: Fish). (A clade / monophyletic group contains all descendants of a species, as well as this species itself, but no other species.)**

- Northern pike, Arowana, and Lanternfish
- Alligator gar, Northern pike, and Lanternfish
- Northern pike and Lanternfish
- Northern pike, Alligator gar, and Arowana
- Arowana and Northern pike

**A6: Which of the following groups is most closely related to the Alligator gar (see Material A: Fish)?**

- Kaluga and Chinese paddlefish
- Shark
- Brook trout and Shark
- Arowana, Kaluga, and Lanternfish
- Brook trout and Mooneye**

**A7: Which of the following is a sequence from the oldest to the youngest group (see Material A: Fish)?**

- Group K, Group B, Group L, Kaluga
- Shark, Brook trout, Chinese paddlefish, Crocodile
- Shark, Group M, Group K, Alligator gar
- Group M, Group K, Group B, Mooneye**
- None of the other answers is correct.

**A8: Which of the following groups is the closest relative to the group M (see Material A: Fish)?**

- Kaluga and Chinese paddlefish
- Brook trout and Northern pike
- Coelanth
- Group K
- All given species are equally closely related to group M.**

**A9: Which of the evolutionary trees on the following page does not show the same relationships as the other three?**

- Tree a)
- Tree b)
- Tree c)
- Tree d)**
- All four trees show the same relationship.



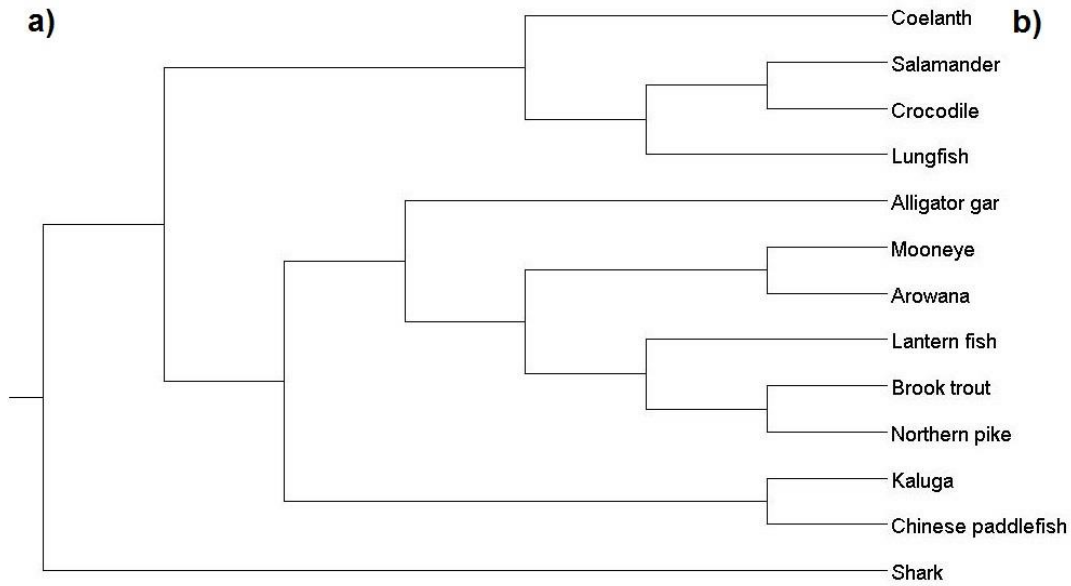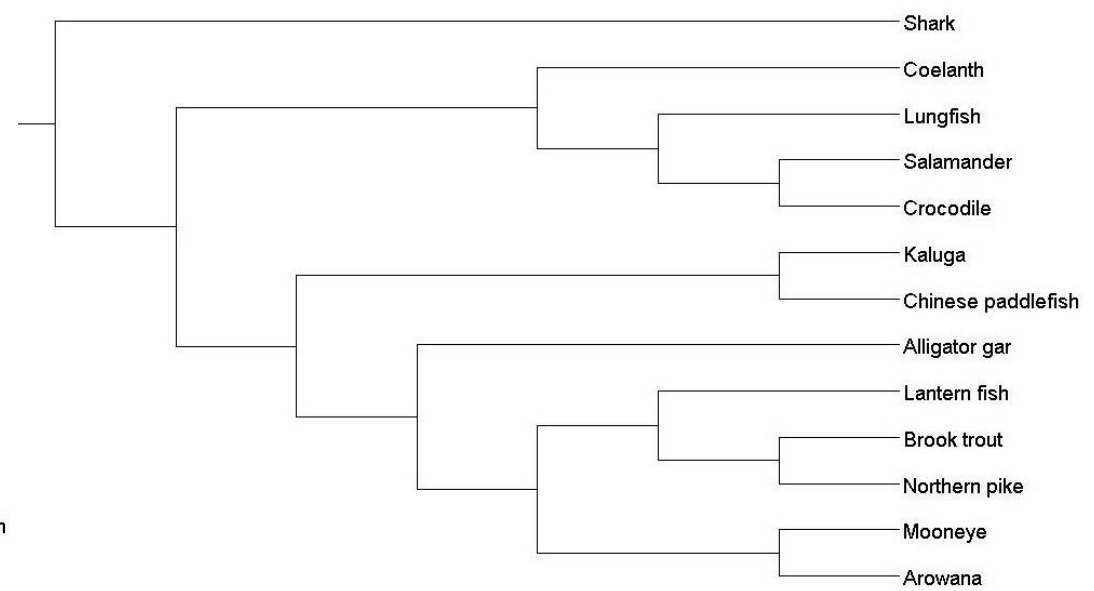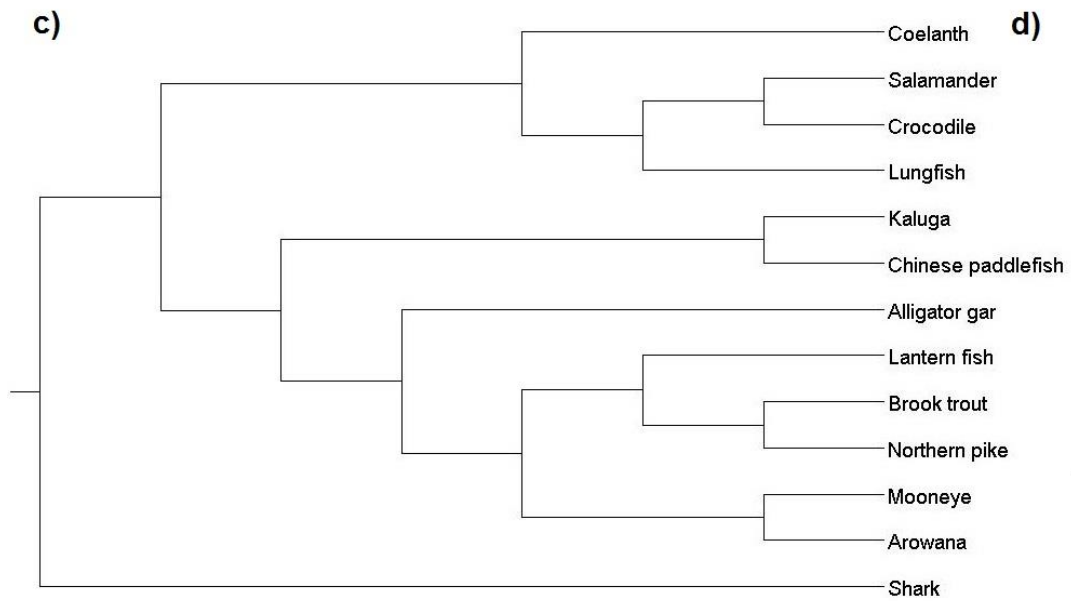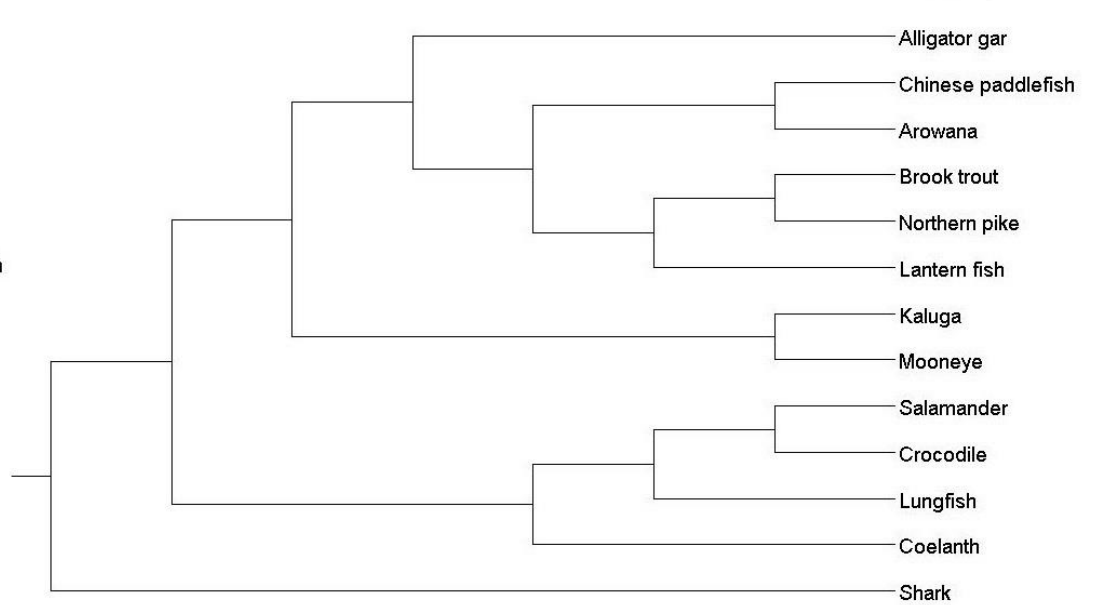

**A10: Assuming that all evolutionary changes are marked in the tree, which of the following traits does a Mooneye show (see Material A: Fish)?**

- |                          |                         |                    |                          |                            |
|--------------------------|-------------------------|--------------------|--------------------------|----------------------------|
| <input type="checkbox"/> | Toothless tongue        | no fishbone        | movable upper jaw        | no sperm                   |
| <input type="checkbox"/> | Tongue with teeth       | no fishbone        | ossified skeleton        | ray-fins                   |
| <input type="checkbox"/> | <b>Toothless tongue</b> | <b>no fishbone</b> | <b>ossified skeleton</b> | <b>sperm with acrosome</b> |
| <input type="checkbox"/> | Tongue with teeth       | no fishbone        | movable upper jaw        | ray-fins                   |
| <input type="checkbox"/> | Toothless tongue        | no fishbone        | no lobe-fins             | fat-fins                   |

**A11: Which traits do Mooneye and Brook trout show (see Material A: Fish).**

- |                          |                          |                                  |                  |                          |
|--------------------------|--------------------------|----------------------------------|------------------|--------------------------|
| <input type="checkbox"/> | Ray-fin                  | light-producing organs           | no lungs         | movable upper jaw        |
| <input type="checkbox"/> | <b>Ossified skeleton</b> | <b>no light producing organs</b> | <b>no amnion</b> | <b>movable upper jaw</b> |
| <input type="checkbox"/> | Toothless tongue         | movable upper jaw                | ray-fins         | light-producing organs   |
| <input type="checkbox"/> | Ossified skeleton        | no breastbone                    | no amnion        | immobile upper jaw       |
| <input type="checkbox"/> | Ossified skeleton        | fishbone                         | ray-fins         | not elongated jaw        |

**A12: Which of the following groups forms a clade / monophyletic group (see Material A: Fish). (A clade / monophyletic group contains all descendants of a species, as well as this species itself, but no other species.)**

- Alligator gar, Brook trout, Northern pike, and Lanternfish
- Northern pike and Lanternfish
- Mooneye and Arowana**
- Coelanth, Lung fish, and Salamander
- Lanternfish, Arowana, Brook trout, and Mooneye

**A13: Which of the following statements is in line with the given tree (see Material A: Fish)?**

- Arowana are more closely related to Kaluga than to Brook trout.
- Arowana are more closely related to Brook trout than to Kaluga**
- The last common Ancestor of Brook trout and Arowana is also an ancestor of Kaluga
- Arowana are equally close related to Brook trout and Kaluga.
- None of the other statements is correct.

**A14: Which of the trees on the next page shows different relationships as the tree given in Material A (Fish)?**

- Tree a)
- Tree b)
- Tree c)
- Tree d)**
- All trees show the same relationships.

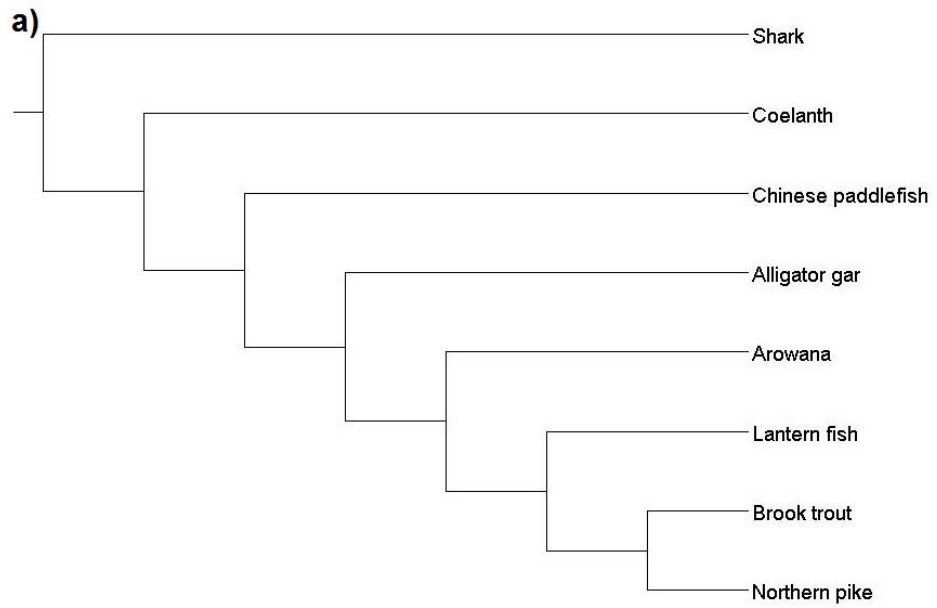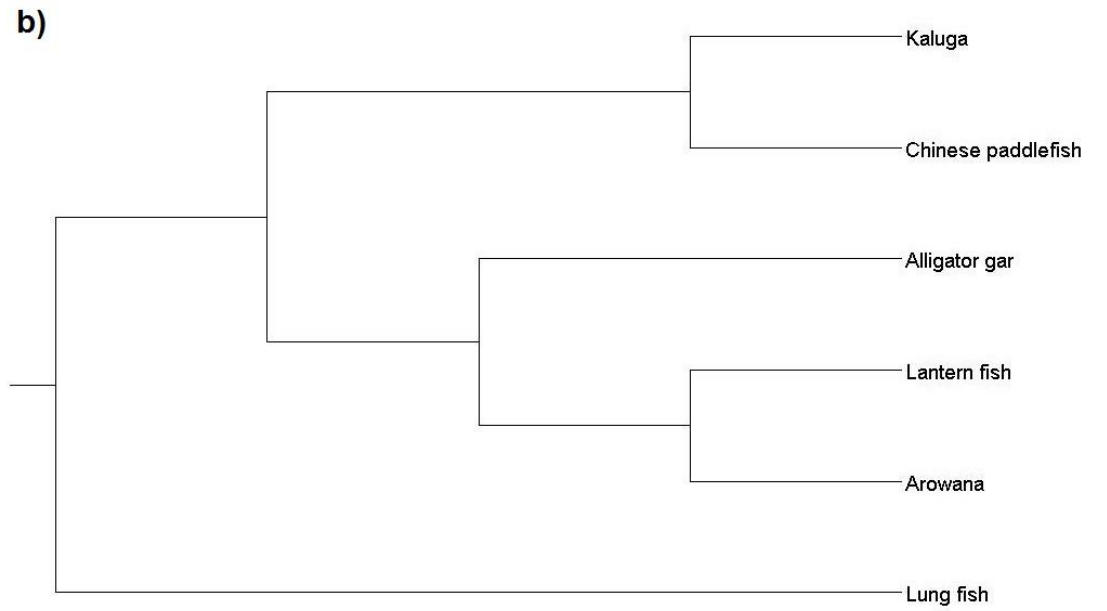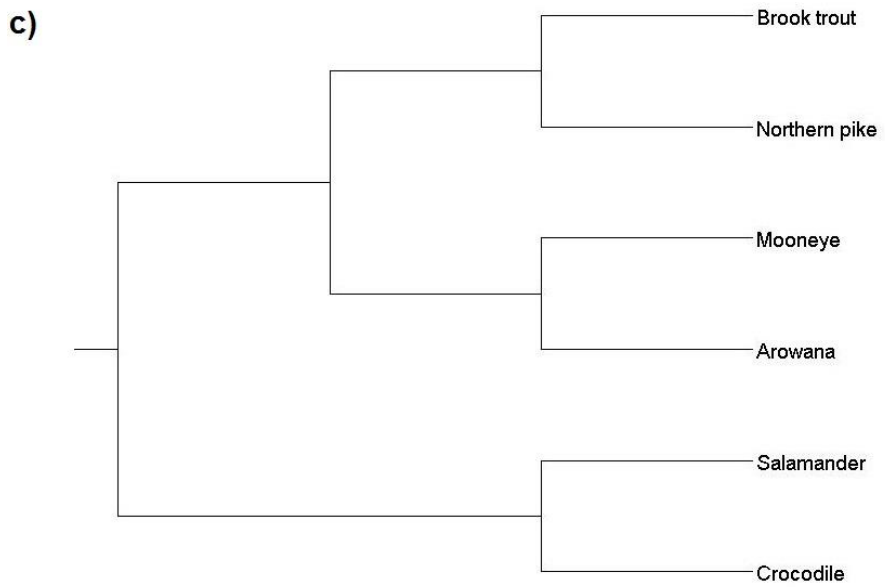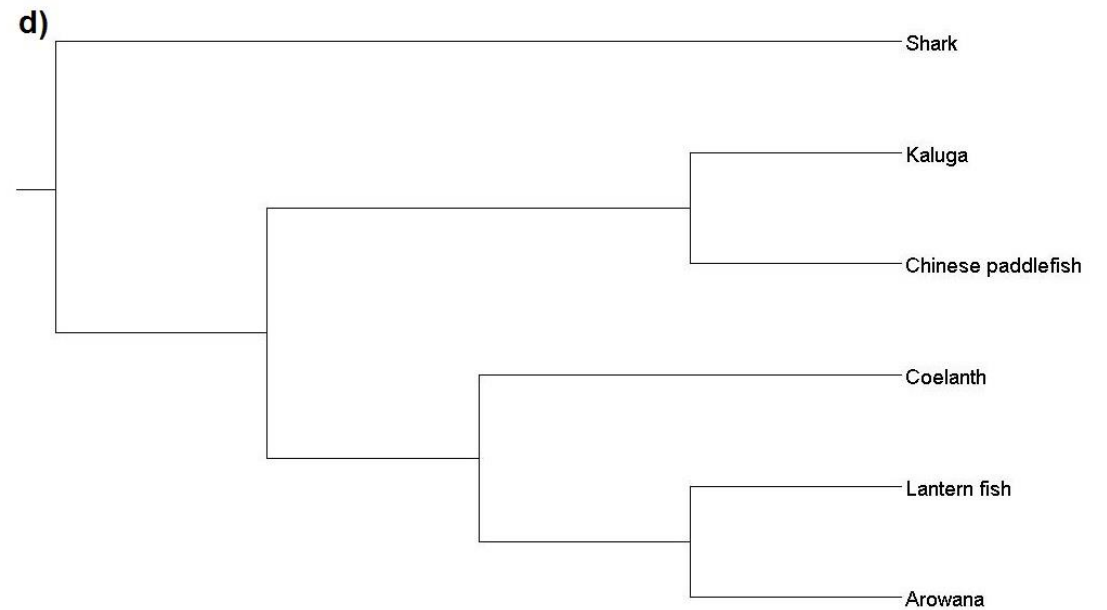

**Material B 'Arthropods'**

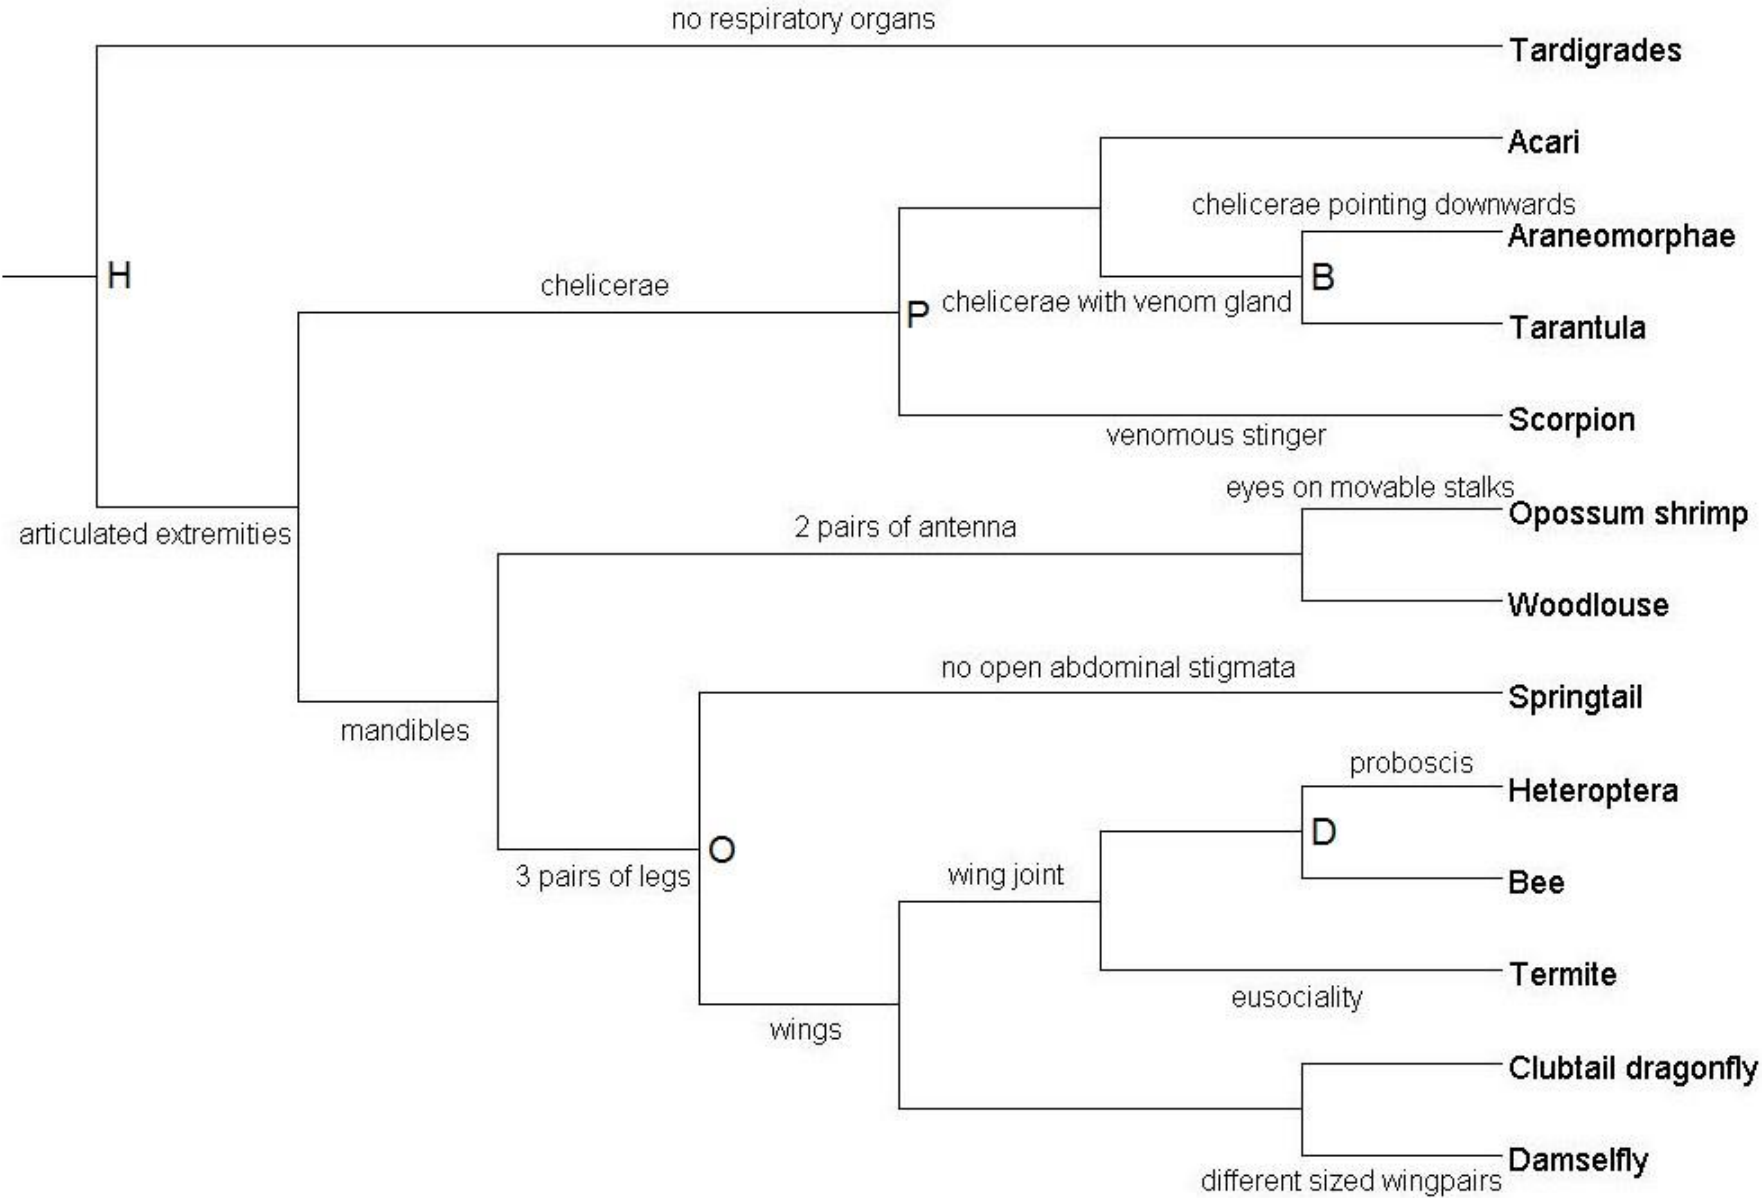

## Arthropods

Please answer the following questions concerning the evolutionary tree of Arthropods (Material B).

### B1: Which of the following statements about the given tree is correct (see Material B: Arthropods)?

- The diagram shows, how species are related to each other via their shared ancestors.**
- The diagram shows, how closely organisms resemble (e.g. look like) each other.
- The diagram shows, which species evolved first, second, third, etc.
- The diagram shows, which species have changed the most over time.
- The diagram shows, which evolutionary developments led to splitting into different species.

### B2: What do the nodes H, O, P, B and D represent (see Material B: Arthropods).

- They represent where two lineages come together.
- They represent the occurrence of mutation, leading to splitting into two groups
- They represent the last common ancestor of groups.**
- They represent the extinction of a species.
- They represent the point where natural selection has occurred.

### B3: Assuming that all evolutionary changes are marked in the tree, which of the following traits do Heteroptera show (see Material B: Arthropods)?

- |                                           |                      |                           |                    |
|-------------------------------------------|----------------------|---------------------------|--------------------|
| <input type="checkbox"/> Mandibles        | 2 pairs of antennae  | wing joint                | respiratory organs |
| <input type="checkbox"/> <b>Proboscis</b> | <b>no chelicerae</b> | <b>respiratory organs</b> | <b>3 leg pairs</b> |
| <input type="checkbox"/> 3 leg pairs      | no wings             | proboscis                 | mandibles          |
| <input type="checkbox"/> Mandibles        | wing joint           | proboscis                 | unjointed legs     |
| <input type="checkbox"/> Proboscis        | wings                | eusociality               | mandibles          |

### B4: Which group shows the following traits: jointed legs, mandibles, respiratory organs, no wing joint and no 2 pair of antennae (see Material B: Arthropods)?

- Dragonfly, Heteroptera, Bee, Termite, and Damselfly
- Dragonfly and Damselfly
- Springtail, Heteroptera, Bee, and Termite
- Springtail, Bee, and Damselfly
- Springtail, Damselfly, and Dragonfly**

**B5: Which of the following groups forms a clade / monophyletic group with Bees and Dragonfly (see Material B: Arthropods). (A clade / monophyletic group contains all descendants of a species, as well as this species itself, but no other species.)**

- Heteroptera and Termite
- Springtails, Heteroptera, and Termite
- Termite, Heteroptera, and Damselfly**
- Damselfly and Heteroptera
- Termite and Springtails

**B6: Which of the evolutionary trees on the following page does not show the same relationships as the other three?**

- Tree a)**
- Tree b)
- Tree c)
- Tree d)
- All four trees show the same relationship.

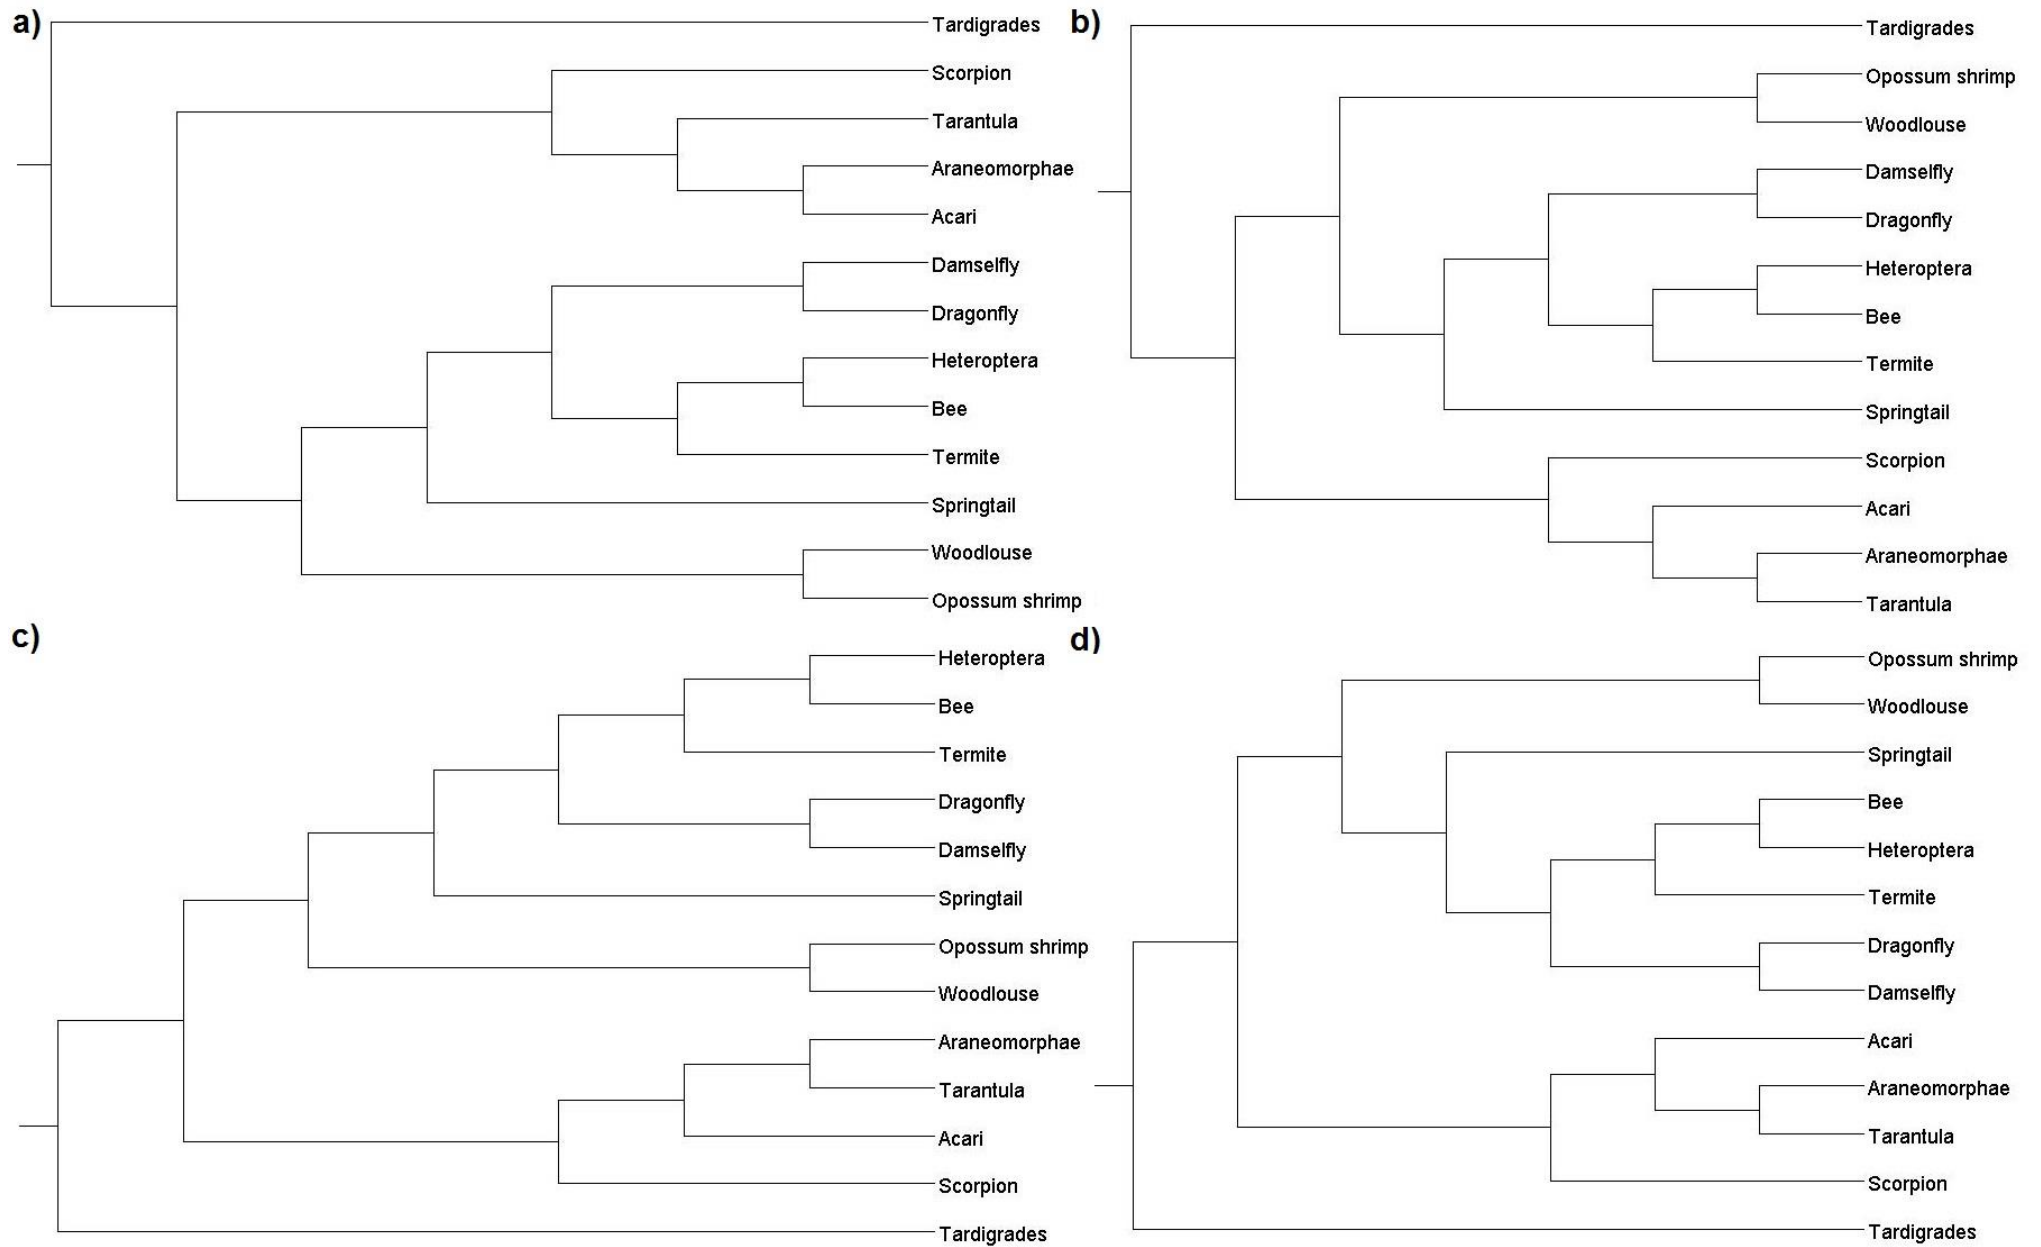

**B7: Which of the following groups is the closest relative to Opossum shrimp (see Material B: Arthropods)?**

- Group H
- Scorpion and Woodlouse
- Tarantula, Araneomorphae, and Scorpion
- Group H, Group P, and Group O
- Dragonfly and Damselfly**

**B8: Which of the following is a sequence from the oldest to the youngest group (see Material B: Arthropods)?**

- Group H, Woodlouse**
- Tardigrade, Group H, Group O, Termite
- Acari, Group P, Group B
- Group H, Group P, Group D
- None of the other answers is correct.

**B9: Which of the following groups is the closest relative to the Group at node O (see Material B: Arthropods)?**

- Woodlouse, Bee, Termite, and Damselfly
- Group H and Group D
- Group H
- Springtail, Termite, and Dragonfly**
- All groups are equally close related to group O.

**B10: Assuming that all evolutionary changes are marked in the tree, which of the following traits does a Scorpion show (see Material B: Arthropods)?**

- |                                                                        |                                                                 |
|------------------------------------------------------------------------|-----------------------------------------------------------------|
| <input type="checkbox"/> Articulated extremities<br>3 leg pairs        | venomous stinger<br>chelicerae                                  |
| <input type="checkbox"/> respiratory organs<br>no mandibles            | chelicerae<br>unjointed extremities                             |
| <input type="checkbox"/> No 3 leg pairs<br>Proboscis                   | no wing joint<br>venomous stinger                               |
| <input type="checkbox"/> <b>jointed extremities</b><br><b>no wings</b> | <b>no 3 leg pairs</b><br><b>chelicerae without venom glands</b> |
| <input type="checkbox"/> jointed extremities<br>no wings               | venomous stinger<br>chelicerae pointing downwards               |



**B11: Which traits do Bees and Termites show (see Material B: Arthropods).**

- |                                                         |                   |                      |                           |
|---------------------------------------------------------|-------------------|----------------------|---------------------------|
| <input type="checkbox"/> mandibles                      | wings             | eusociality          | 3 leg pairs               |
| <input type="checkbox"/> not 2 pairs of antennae        | mandibles         | 3 leg pairs          | unjointed extremities     |
| <input type="checkbox"/> articulated extremities        | chelicerae        | wings                | abdominal stigmata        |
| <input type="checkbox"/> <b>articulated extremities</b> | <b>wing joint</b> | <b>no chelicerae</b> | <b>respiratory organs</b> |
| <input type="checkbox"/> mandibles                      | 3 leg pairs       | proboscis            | articulated extremities   |

**B12: Which of the following groups forms a clade / monophyletic group (see Material B: Arthropods)? (A clade / monophyletic group contains all descendants of a species, as well as this species itself, but no other species.)**

- Araneomorphae, Scorpion, and Tarantula
- Opossum shrimp and Woodlouse**
- Scorpion, Opossum shrimp, and Woodlouse
- Heteroptera, Bee, Termite, and Springtail
- Termite, Dragonfly, and Damselfly

**B13: Which of the following groups is the closest relative to Acari (see Material B: Arthropods)?**

- Opossum shrimp, Woodlouse, and Springtail
- Dragonfly and Damselfly
- Heteroptera, Bee, and Termite**
- Woodlouse, Heteroptera, and Dragonfly
- All stated groups are equally closely related to Acari.

**A14: Which of the trees on the next page shows different relationships as the tree given in Material B (Arthropods)?**

- Tree a)
- Tree b)
- Tree c)**
- Tree d)
- All trees show the same relationships.

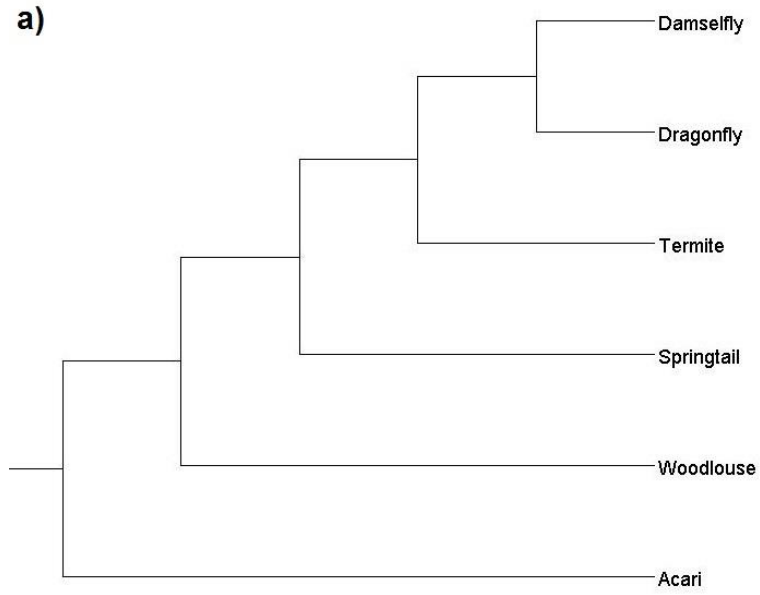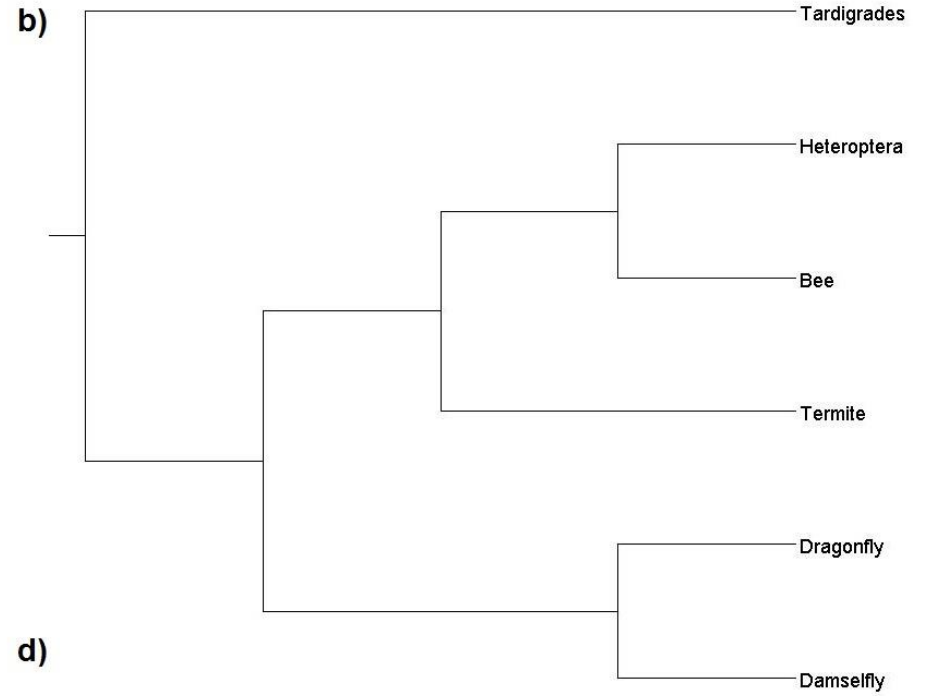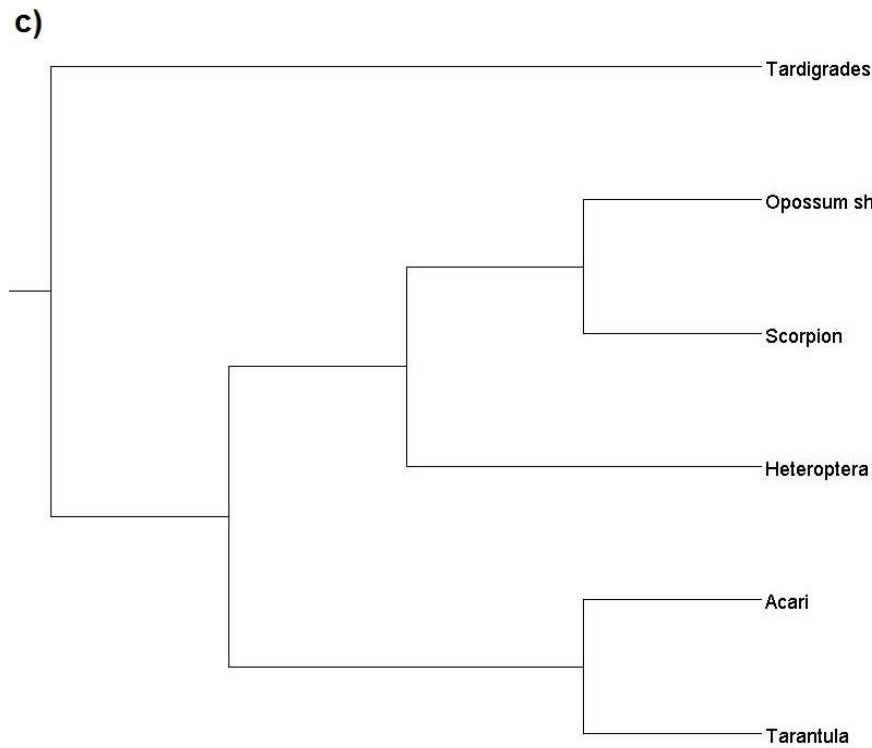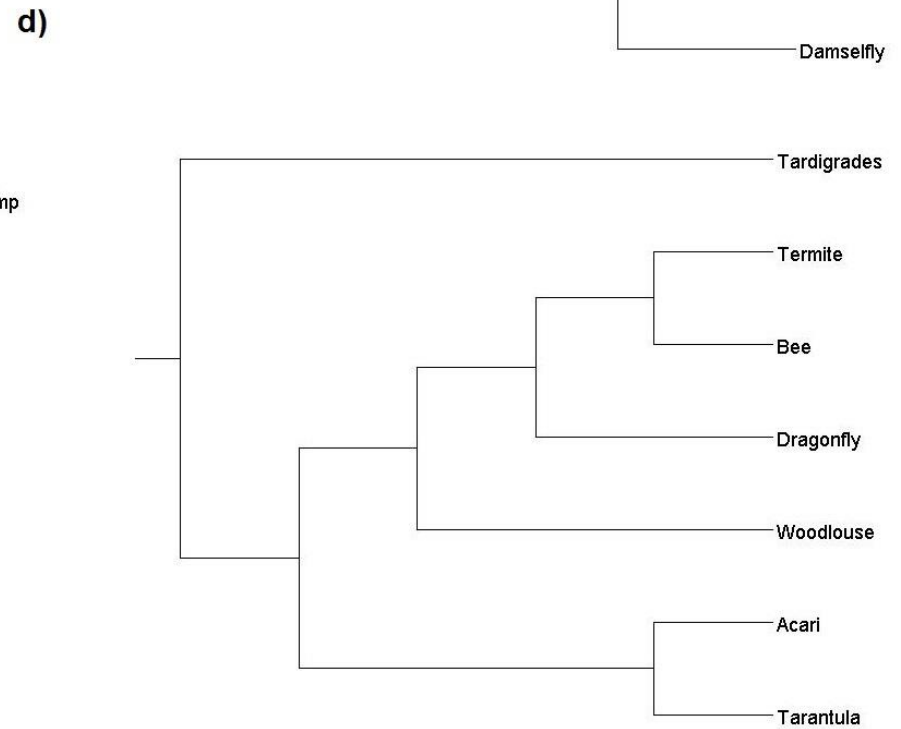

Supplement: combinedsupmats.pdf [file combinedsupmats.pdf]
